# Supplementary material for: Superconductivity in a unique type of copper oxide
Source: PubMed Central journal article supplement — Proc Natl Acad Sci U S A. 2019 May 20;116(25):12156–60. doi: 10.1073/pnas.1900908116 (PMC6589659; doi:10.1073/pnas.1900908116), 2019-05-20

## Supplementary Information SI(MS 2019.00908)

### Superconductivity in a unique type of copper oxide

W. M. Li<sup>a,b,c</sup>, J. F. Zhao<sup>a,b</sup>, L. P. Cao<sup>a,b</sup>, Z. Hu<sup>d</sup>, Q. Z. Huang<sup>e</sup>, X. C. Wang<sup>a,b,c</sup>, Y. Liu<sup>a,b</sup>, G. Q. Zhao<sup>a,b</sup>, J. Zhang<sup>a,b</sup>, Q. Q. Liu<sup>a,b</sup>, R. Z. Yu<sup>a,b,c</sup>, Y. W. Long<sup>a,b,c</sup>, H. Wu<sup>e</sup>, H. J. Lin<sup>f</sup>, C. T. Chen<sup>f</sup>, Z. Li<sup>g</sup>, Z. Z. Gong<sup>h</sup>, Z. Guguchia<sup>h</sup>, J. S. Kim<sup>i</sup>, G. R. Stewart<sup>i</sup>, Y. J. Uemura<sup>h</sup>, S. Uchida<sup>a,j</sup>, and C.Q Jin<sup>a,b,c,l</sup>

<sup>a</sup>Institute of Physics, Chinese Academy of Sciences, 100190 Beijing, China;

<sup>b</sup>School of Physics, University of Chinese Academy of Sciences, Chinese Academy of Sciences, 100190 Beijing, China;

<sup>c</sup>Materials Research Lab at Songshan Lake, 523808 Dongguan, China;

<sup>d</sup>Max Planck Institute for Chemical Physics of Solids, Nöthnitzer Straße 40, 01187 Dresden, Germany;

<sup>e</sup>NIST Center for Neutron Research, National Institute of Standard and Technology, Gaithersburg, MD 20899, USA;

<sup>f</sup>National Synchrotron Radiation Research Center, 30076 Hsinchu, Taiwan;

<sup>g</sup>School of Materials Science and Engineering, Nanjing University of Science and Technology, 210094 Nanjing, China;

<sup>h</sup>Department of Physics, Columbia University, New York, NY 10027, USA;

<sup>i</sup>Department of Physics, University of Florida, Gainesville, FL 32611-8440, USA;

<sup>j</sup>Department of Physics, University of Tokyo, 113-0033 Tokyo, Japan

**Table S1.** Summary of the primary structure based on Rietveld refinements of  $\text{Ba}_2\text{CuO}_{4-y}$  from powder X-ray diffraction patterns at room temperature. The abbreviations of  $R_{wp}$  &  $R_p$  &  $\chi^2$  correspond to weight profile reliability factor, profile reliability factor, and match factor, respectively.  $U_{iso}$  is the isotropic atomic displacement parameter.

---

Formula:  $\text{Ba}_2\text{CuO}_{4-y}$  (T=300K); Space group:  $I4/mmm$  (No.139)

$a = 4.0030(3)$  (Å);  $c = 12.942$  (1) (Å);

$R_{wp}$ : 3.41%;  $R_p$ : 2.47%;  $\chi^2$ : 1.114

---

Atomic parameters

---

| Atom | Wyckoff position | x | y   | z          | occupancy | $U_{iso}$<br>(*10 <sup>-2</sup> Å <sup>2</sup> ) |
|------|------------------|---|-----|------------|-----------|--------------------------------------------------|
| Ba   | 4e               | 0 | 0   | 0.35627(7) | 1         | 1.66(6)                                          |
| Cu   | 2a               | 0 | 0   | 0          | 1         | 1.51(9)                                          |
| O1   | 4e               | 0 | 0   | 0.1438(6)  | 1         | 1.6(1)                                           |
| O2   | 4c               | 0 | 0.5 | 0          | 0.592(15) | 7(1)                                             |

---

### Band structure of Ba<sub>2</sub>CuO<sub>4</sub>

To get some insight, the electronic energy band structure calculation in the local-density-approximation (LDA) is performed for an ideal Ba<sub>2</sub>CuO<sub>4</sub> (nominal valence is Cu<sup>4+</sup> ( $3d^7$ )) with the same lattice parameters as those of the present cuprate,  $a = 4.003 \text{ \AA}$  and  $c = 12.94 \text{ \AA}$  ( $d_A = 1.86 \text{ \AA}$ ). The calculated band structure is displayed in **Fig. S1a** and is supportive of the multi-band nature of Ba<sub>2</sub>CuO<sub>4</sub>. There are two bands prevailing near the Fermi level ( $E_F$ ), one with  $3dz^2$  orbital character (blue) and the other with  $3dx^2-y^2$  orbital character (red). Both bands almost completely overlap in energy, since the width of the  $dx^2-y^2$  derived band is narrow due to the long in-plane Cu-O bond length. Even if  $E_F$  shifts up, in a rigid band manner, to the energy corresponding to a realistic hole density, somewhere between Cu<sup>3+</sup> ( $3d^8$ ) and Cu<sup>2+</sup> ( $3d^9$ ), both bands contribute nearly equally to the states near the Fermi level. The Fermi surface at the Fermi energy  $E_F$  corresponding to the Cu<sup>3+</sup> ( $3d^8$ ) filling is shown in **Fig. S1b**. Two types of Fermi surfaces are identified, one electron surface surrounding the Brillouin zone center ( $\Gamma$ ) with  $3dz^2$  orbital character (in blue) and one hole surface around the corner (M) of the zone with  $3dx^2-y^2$  orbital character (in red). Basically the same calculation results have been reported in the Preprint at <https://arXiv.org/abs/1809.04156> (2018), by Maier, T.A., Berlijn, T. & Scalapino, D.J. *d*-wave and  $s^\pm$  Pairing Strengths in Ba<sub>2</sub>CuO<sub>3+ $\delta$</sub> .

Fig. S1a

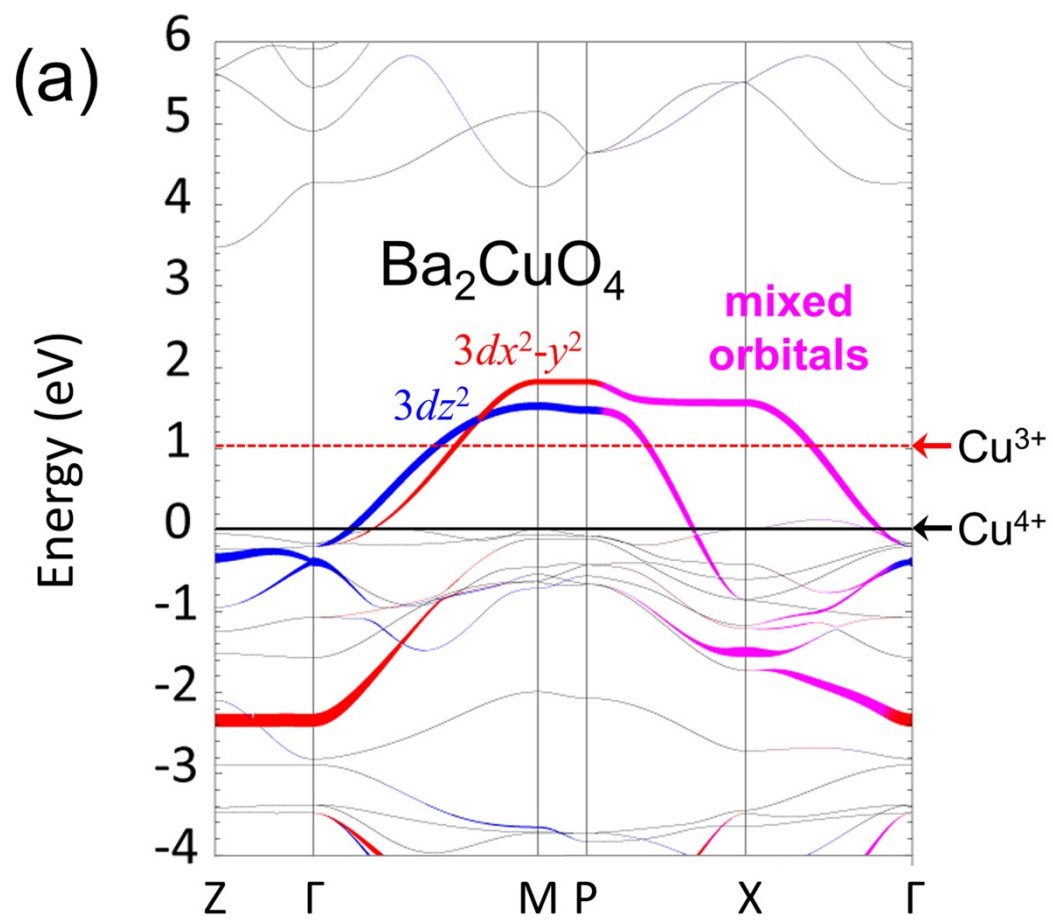

Fig. S1b

(b)

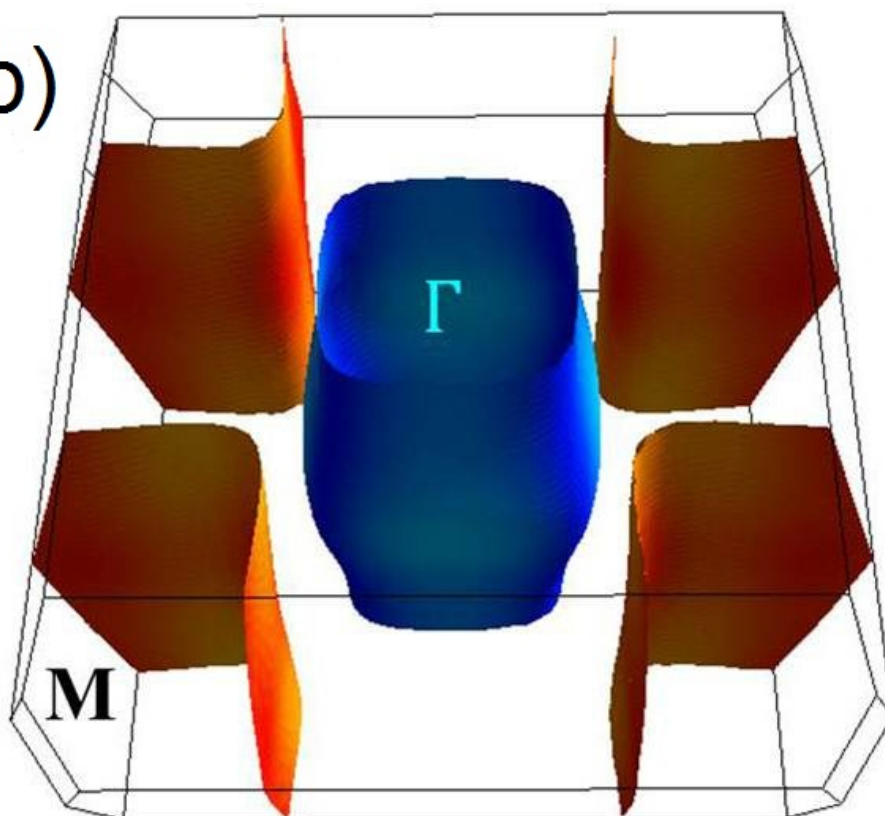

Supplement: pnas.1900908116.sapp.pdf [file pnas.1900908116.sapp.pdf]
